# Supplementary material
Source: PubMed Central journal article supplement (PMC10592171)

Supplementary Figure 2

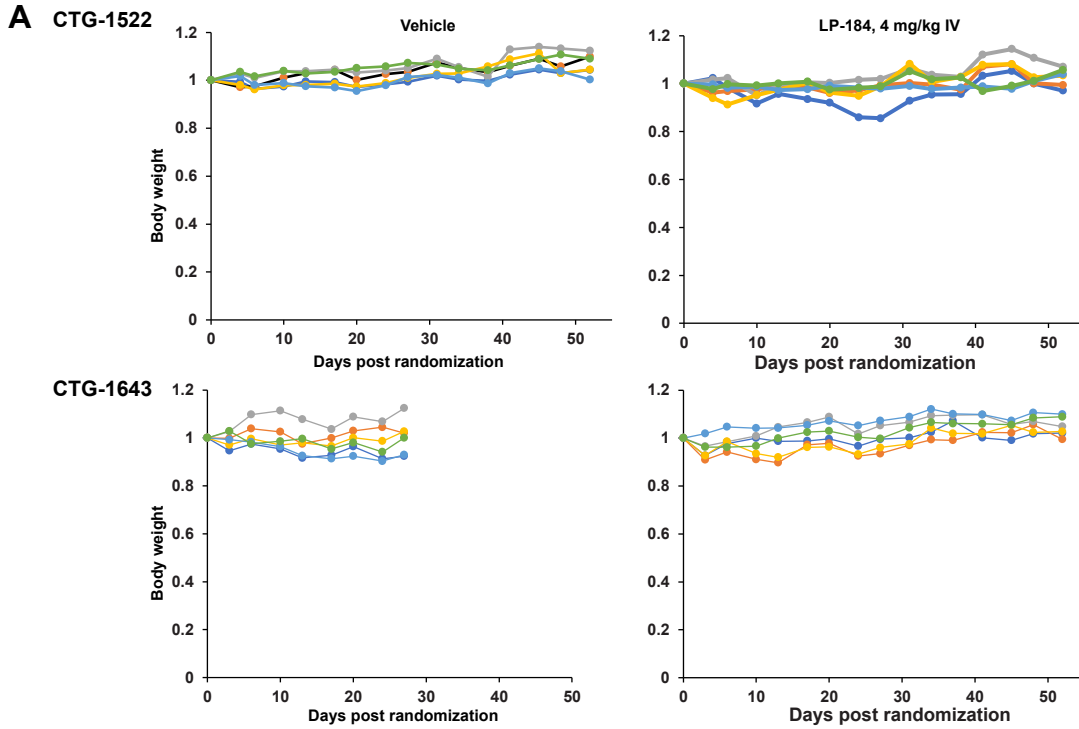

**B**

|                    |           | Day       |     |   |   |   |    |    |    |    |    |    |    |    |    |    |    |    | total doses | Ave doses |    |    |     |     |
|--------------------|-----------|-----------|-----|---|---|---|----|----|----|----|----|----|----|----|----|----|----|----|-------------|-----------|----|----|-----|-----|
|                    |           | 0         | 2   | 5 | 7 | 9 | 12 | 14 | 16 | 19 | 21 | 23 | 26 | 28 | 30 | 33 | 35 | 37 |             |           | 40 | 42 | 44  |     |
| Vehicle IP         | sgControl | 1_1       | x   | x | x | x | x  | x  | x  | x  | x  | x  |    |    |    |    |    |    |             |           |    | 9  | 9.0 |     |
|                    |           | 1_2       | x   | x | x | x | x  | x  | x  | x  | x  | x  |    |    |    |    |    |    |             |           |    |    | 9   |     |
|                    |           | 1_3       | x   | x | x | x | x  | x  | x  | x  | x  | x  |    |    |    |    |    |    |             |           |    |    | 9   |     |
|                    |           | sgPTGRt   | 2_1 | x | x | x | x  | x  | x  | x  | x  | x  |    |    |    |    |    |    |             |           |    |    | 9   | 9.0 |
|                    |           |           | 2_2 | x | x | x | x  | x  | x  | x  | x  | x  |    |    |    |    |    |    |             |           |    |    | 9   |     |
|                    |           |           | 2_3 | x | x | x | x  | x  | x  | x  | x  | x  |    |    |    |    |    |    |             |           |    |    | 9   |     |
|                    |           |           | 2_4 | x | x | x | x  | x  | x  | x  | x  | x  |    |    |    |    |    |    |             |           |    |    | 9   |     |
|                    |           | sgControl | 3_1 | x | x | x | x  | x  | x  | x  | x  |    |    |    | x  |    |    |    |             |           |    |    | 9   | 8.2 |
|                    |           |           | 3_2 | x | x | x | x  | x  | x  |    |    |    |    |    |    | x  |    | x  |             | x         |    |    | 9   |     |
| LP-184, 3 mg/kg IP |           | 3_3       | x   | x | x |   | x  | x  |    |    |    |    | x  | x  |    | x  | x  |    |             |           |    | 9  |     |     |
|                    |           | 3_4       | x   | x | x | x | x  |    |    | x  |    | x  |    | x  |    |    |    |    |             |           |    | 8  |     |     |
|                    |           | 3_5       | x   | x | x |   |    |    | x  | x  |    | x  | x  |    |    |    |    |    |             |           |    |    | 7   |     |
|                    |           | 3_6       | x   | x | x | x | x  |    |    | x  | x  |    |    |    |    |    |    |    |             |           |    |    | 7   |     |
|                    |           | sgPTGRt   | 4_1 | x | x | x | x  | x  |    |    |    | x  |    |    | x  |    | x  |    |             |           |    | x  | 9   | 8.2 |
|                    |           |           | 4_2 | x | x | x | x  | x  | x  | x  |    |    |    |    |    |    | x  |    |             |           |    | x  | 9   |     |
|                    |           |           | 4_3 | x | x | x | x  |    |    |    | x  |    |    | x  | x  |    | x  | x  |             |           |    |    | 9   |     |
|                    |           |           | 4_4 | x | x | x | x  | x  | x  |    |    |    | x  | x  |    | x  |    |    |             |           |    |    | 9   |     |
|                    |           |           | 4_5 | x | x | x | x  |    |    |    | x  | x  |    |    |    |    |    |    |             |           |    |    | 6   |     |
|                    |           | 4_6       | x   | x | x | x |    |    | x  | x  |    | x  |    |    |    |    |    |    |             |           |    | 7  |     |     |

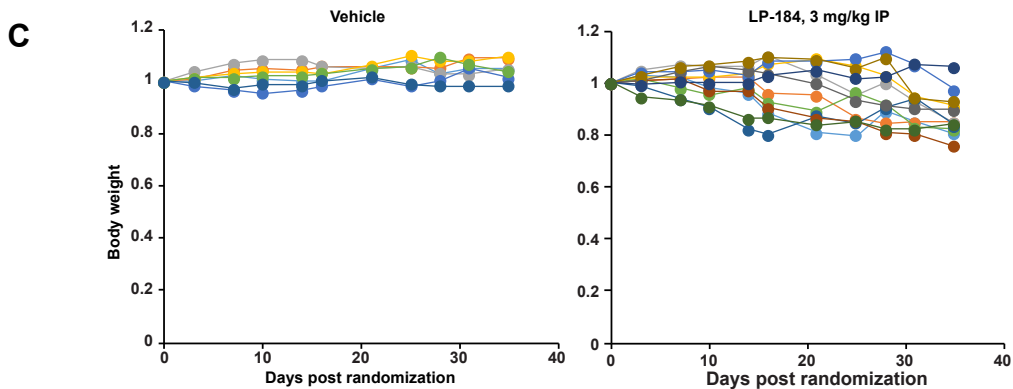

Supplement: NIHMS1924388-supplement-3.pdf [file NIHMS1924388-supplement-3.pdf]
