# Supplementary material
Source: PubMed Central journal article supplement (PMC10592171)

# Supplementary Figure 1

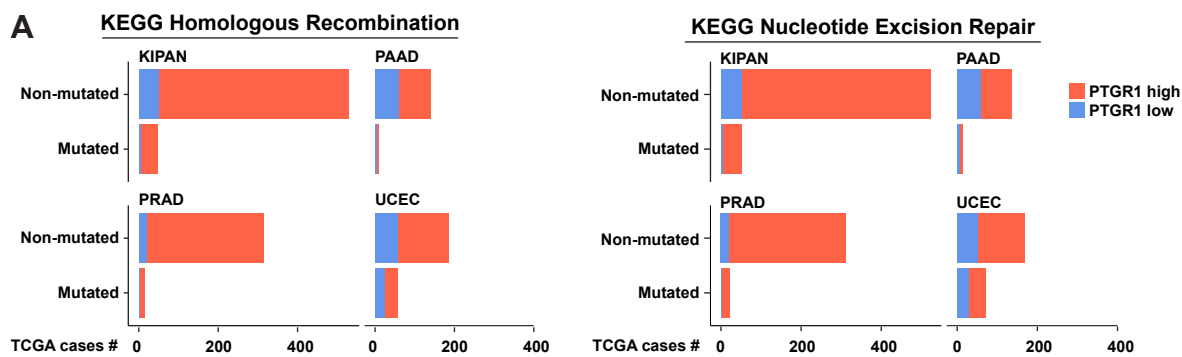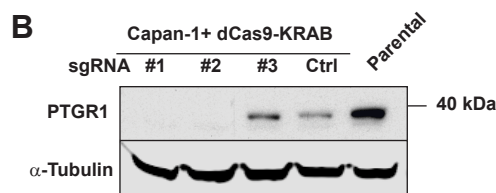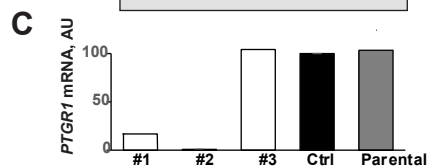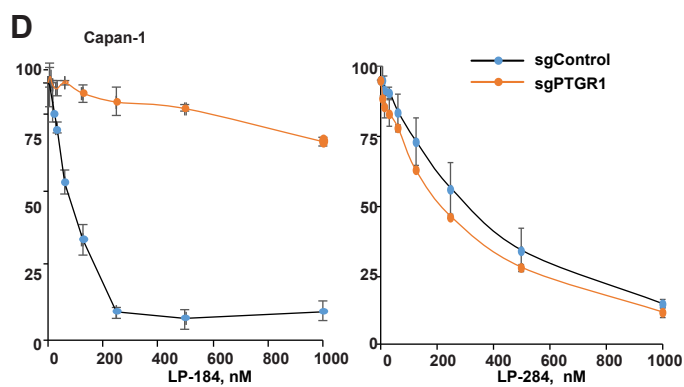

Supplement: NIHMS1924388-supplement-2.pdf [file NIHMS1924388-supplement-2.pdf]
